# Supplementary material for: Evaluating Suitability of Fishing Areas for Squid-Jigging Vessels in the Northwest Pacific Ocean Derived from AIS Data
Source: MDPI journal article supplement (doi:10.3390/fishes8100530), 2023-10-23
Supplement: s1 [file s1]

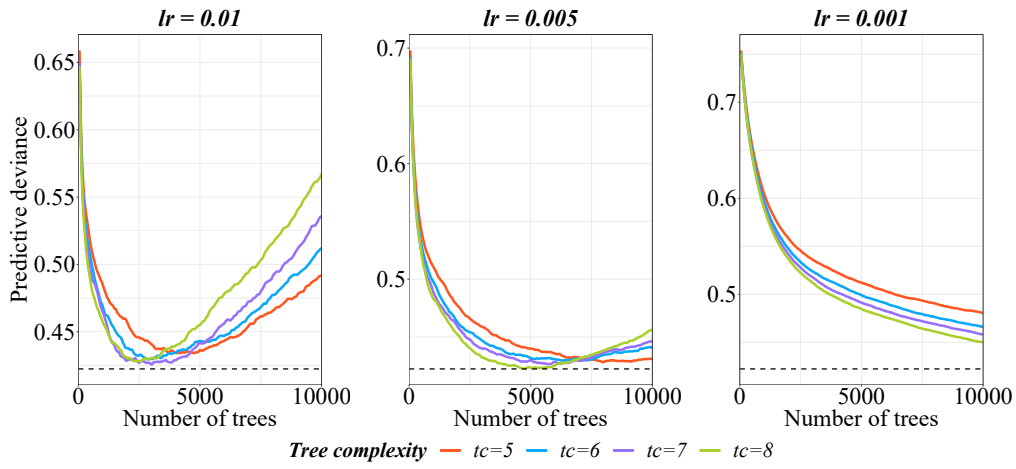

(a) June

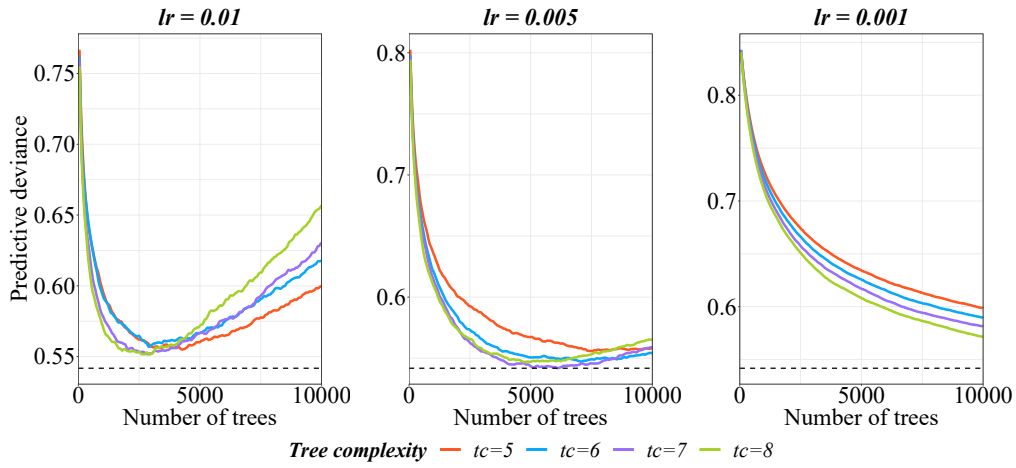

(b) July

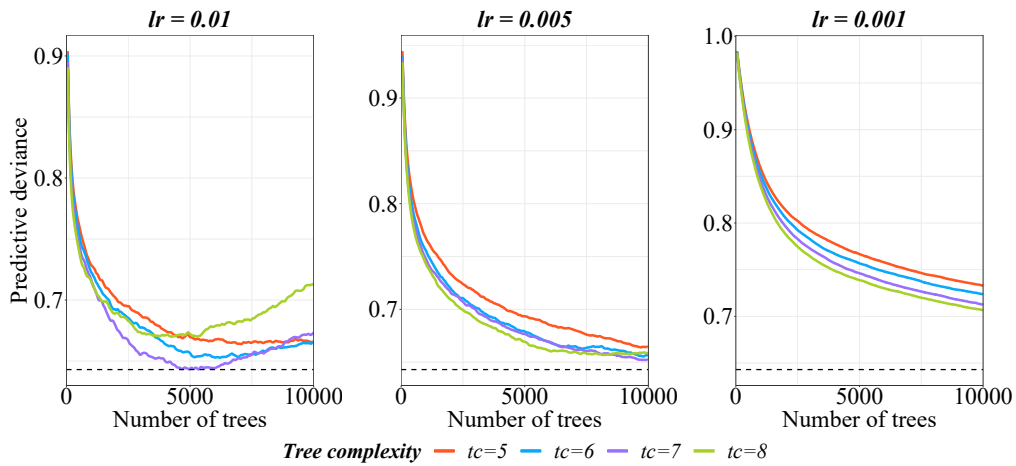

(c) August

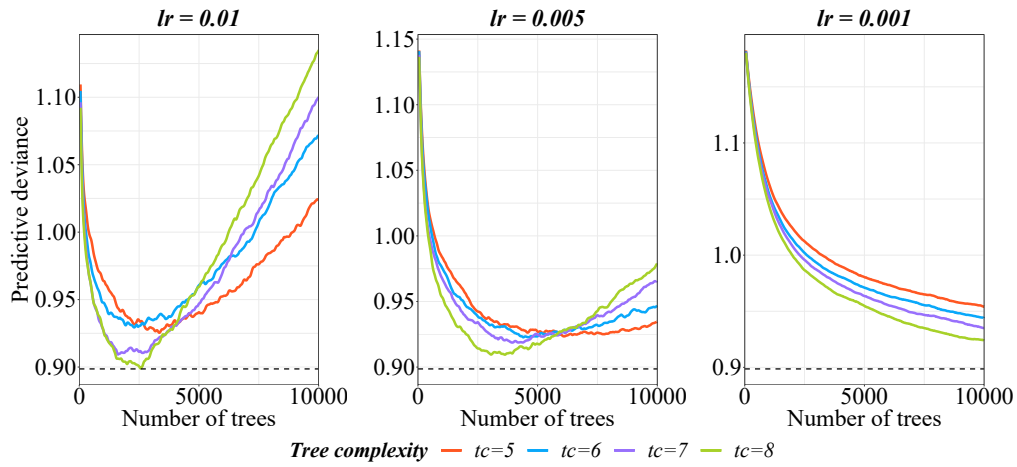

(d) September

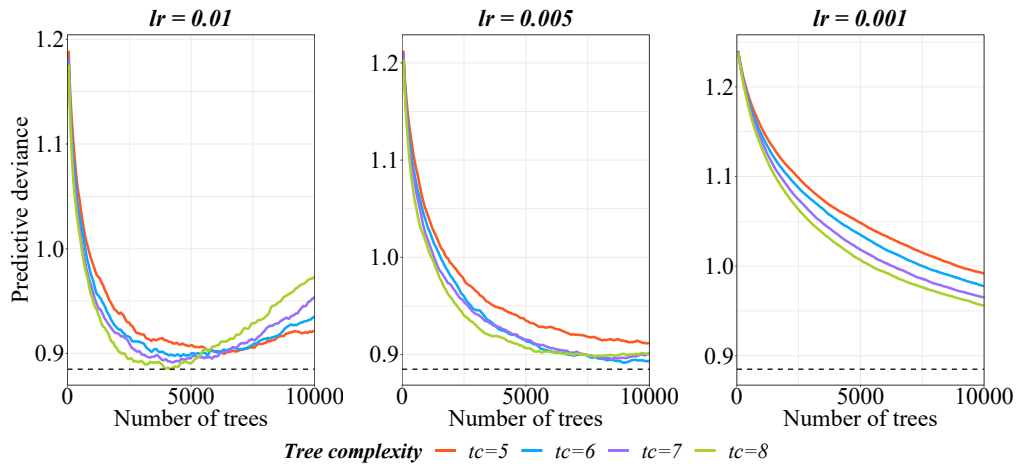

(e) October

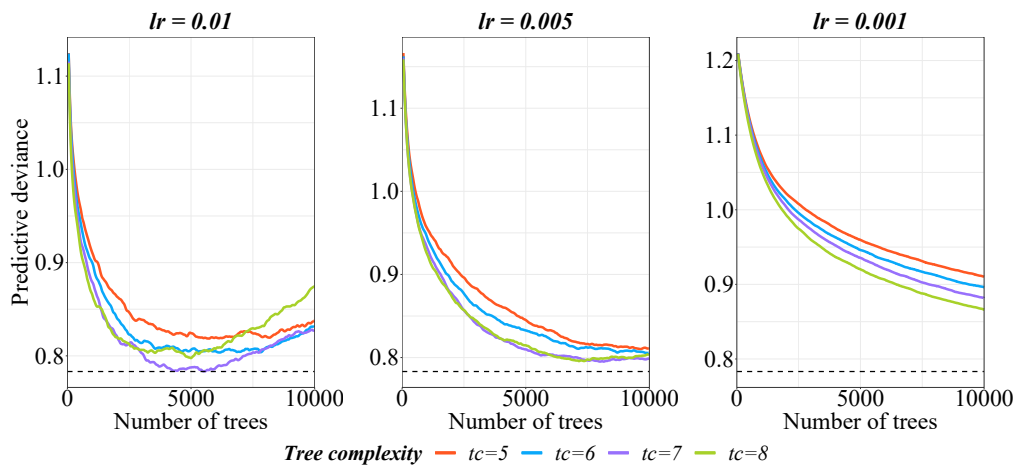

(f) November

**Figure S1:** Predictive deviance under different learning rates and complexities for each month when the BRT model was first developed.

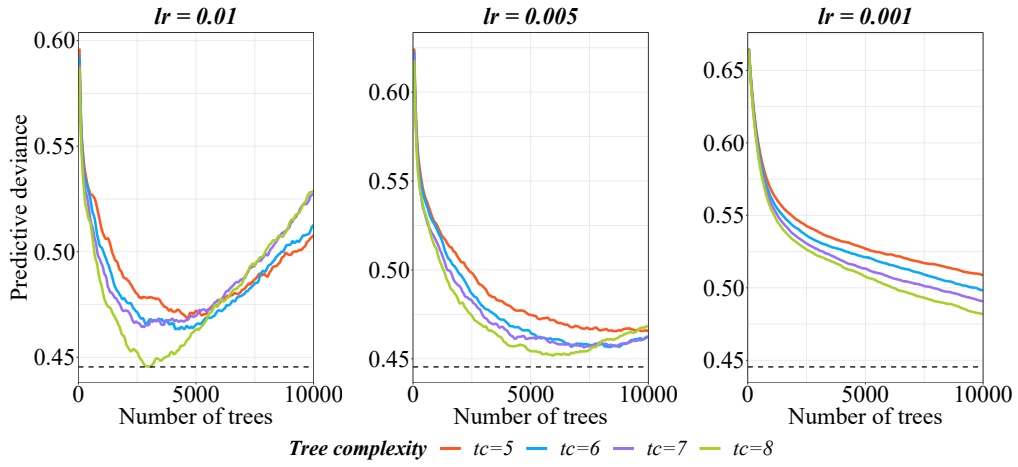

(a) June

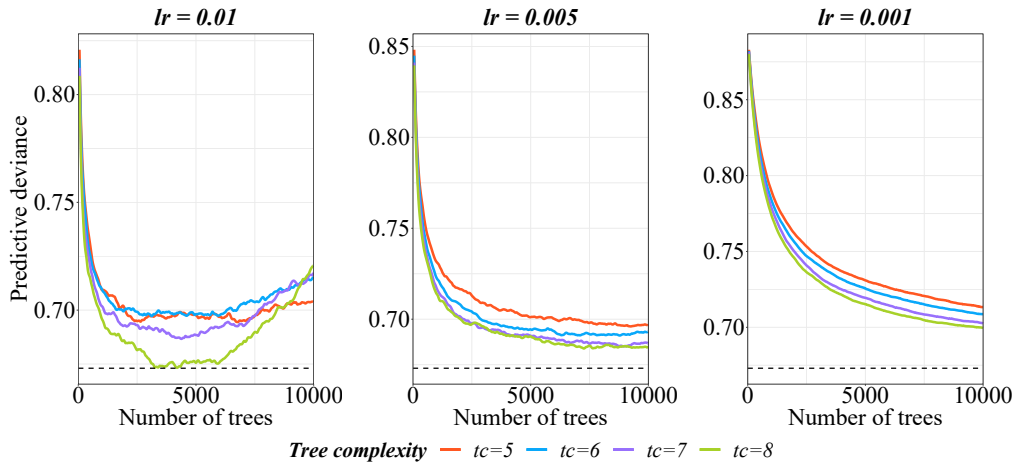

(b) July

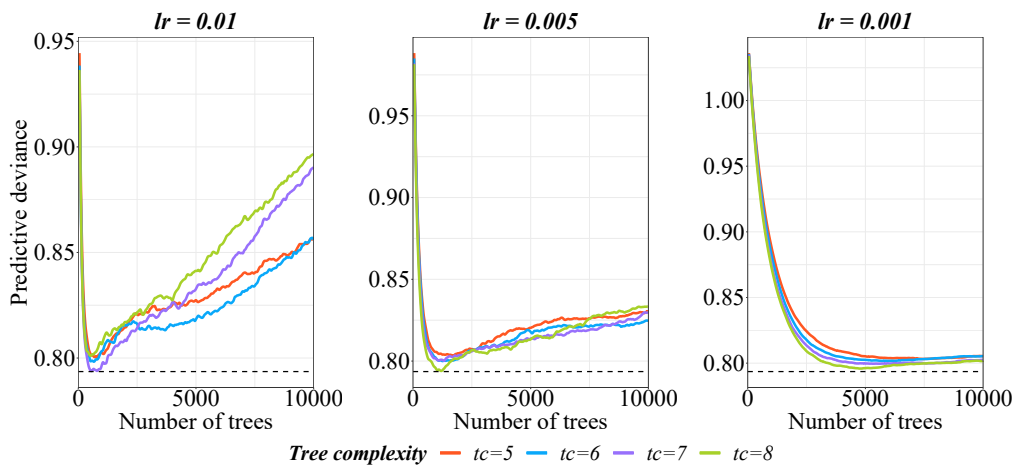

(c) August

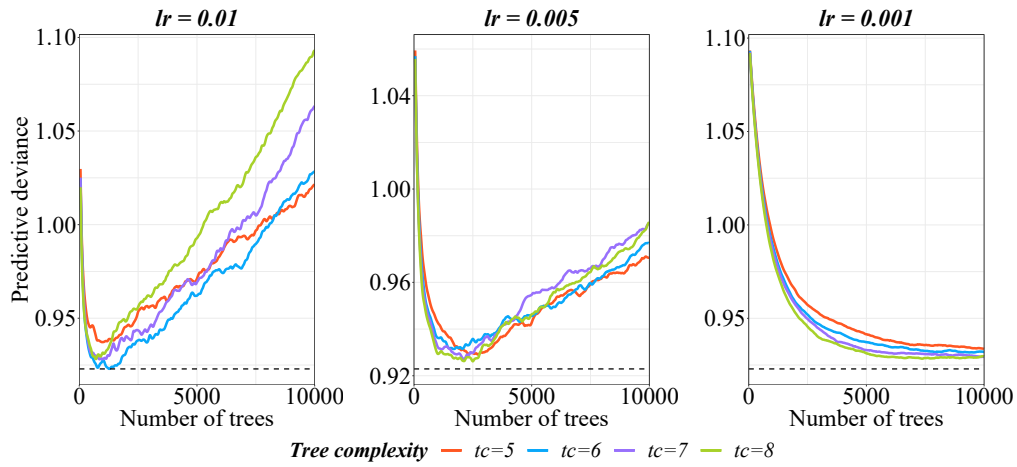

(d) September

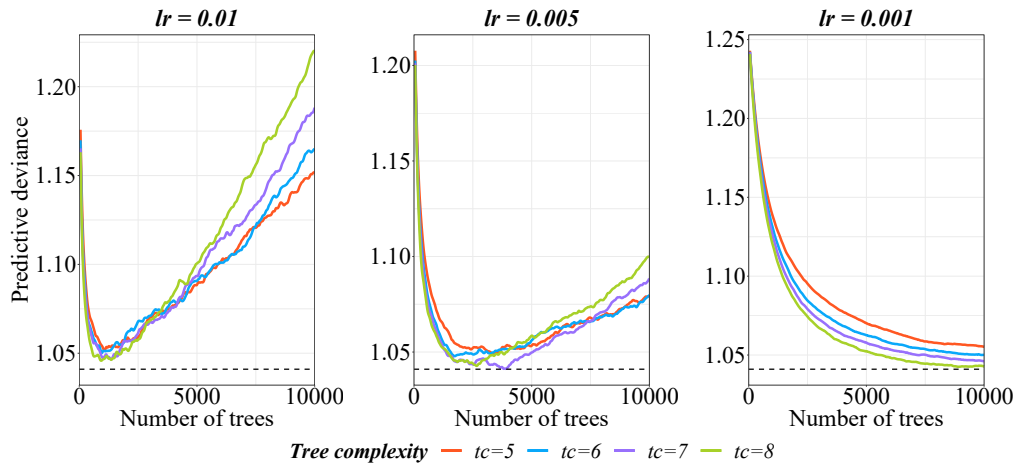

(e) October

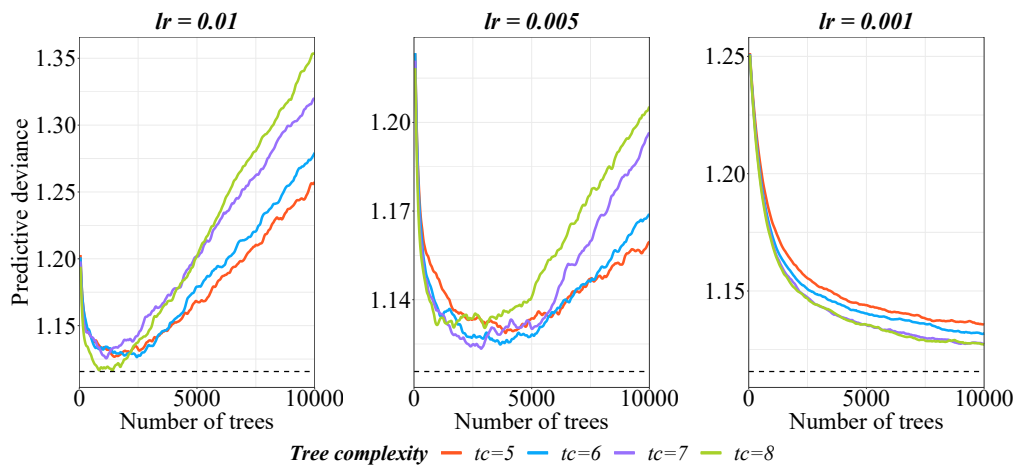

(f) November

**Figure S2:** Predictive deviance under different learning rates and complexities for each month when the BRT model was second developed.

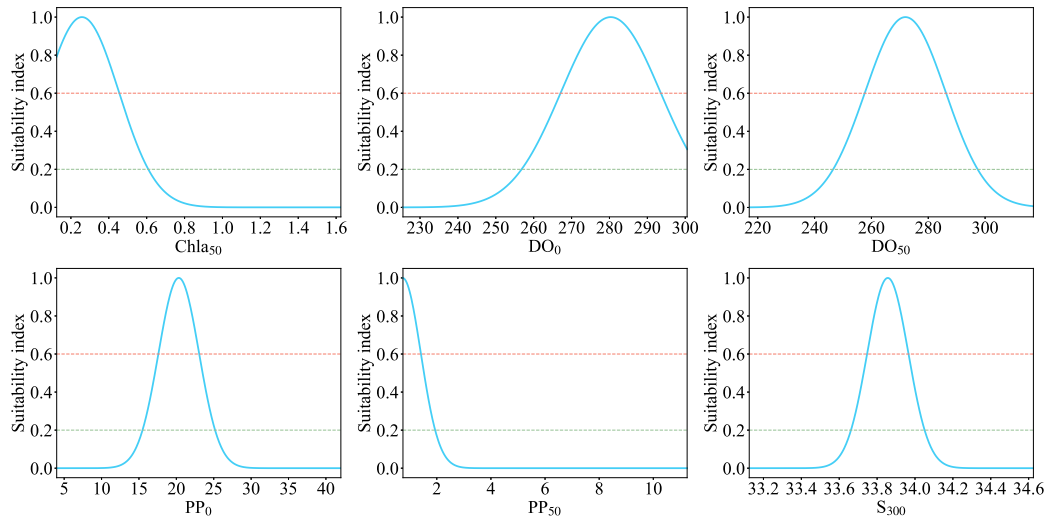

(a) June

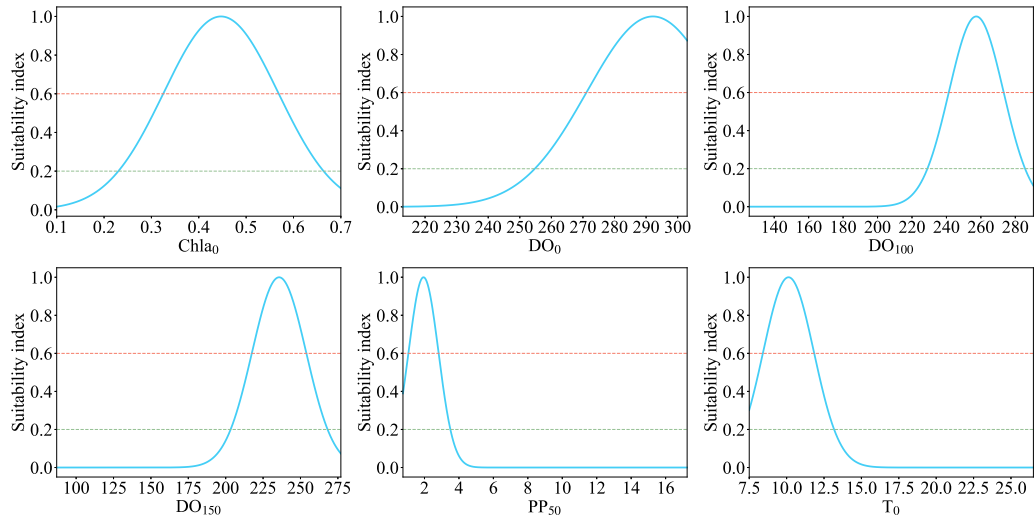

(b) July

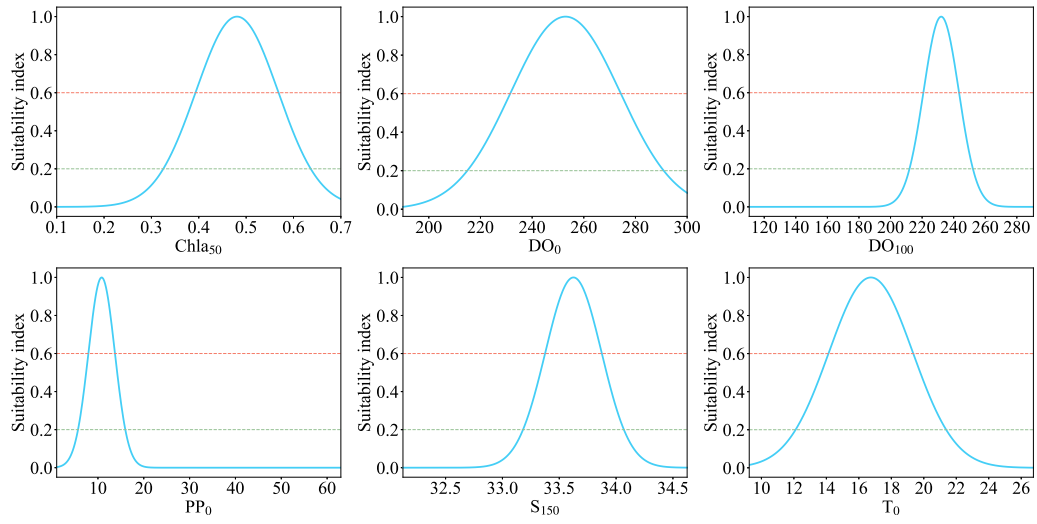

(c) August

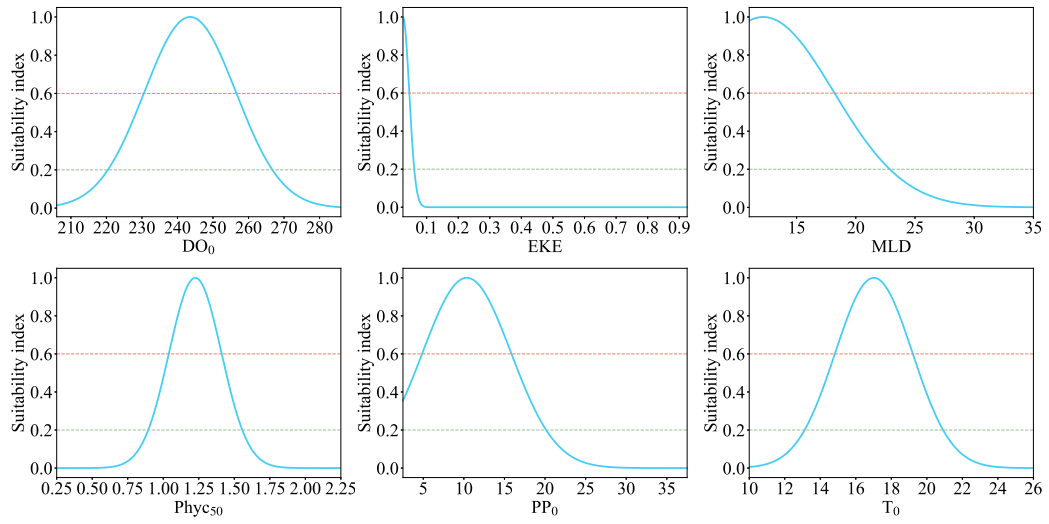

(d) September

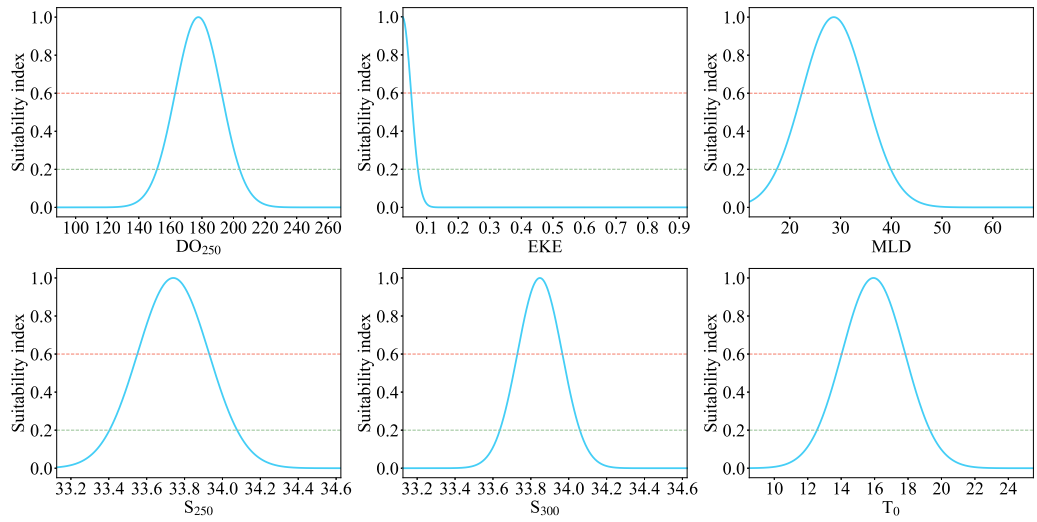

(e) October

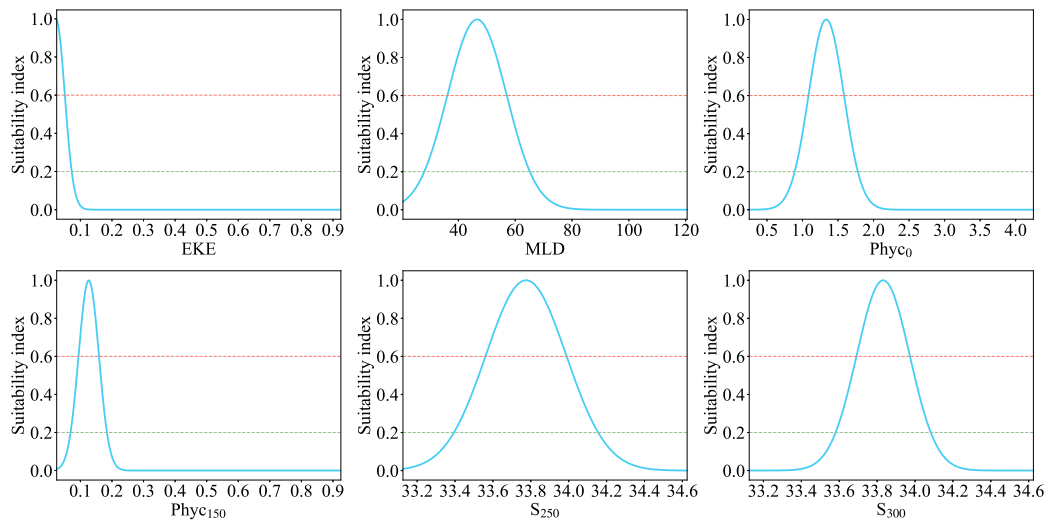

(f) November

**Figure S3:** Predictive deviance under different learning rates and complexities for each month when the BRT model was second developed.

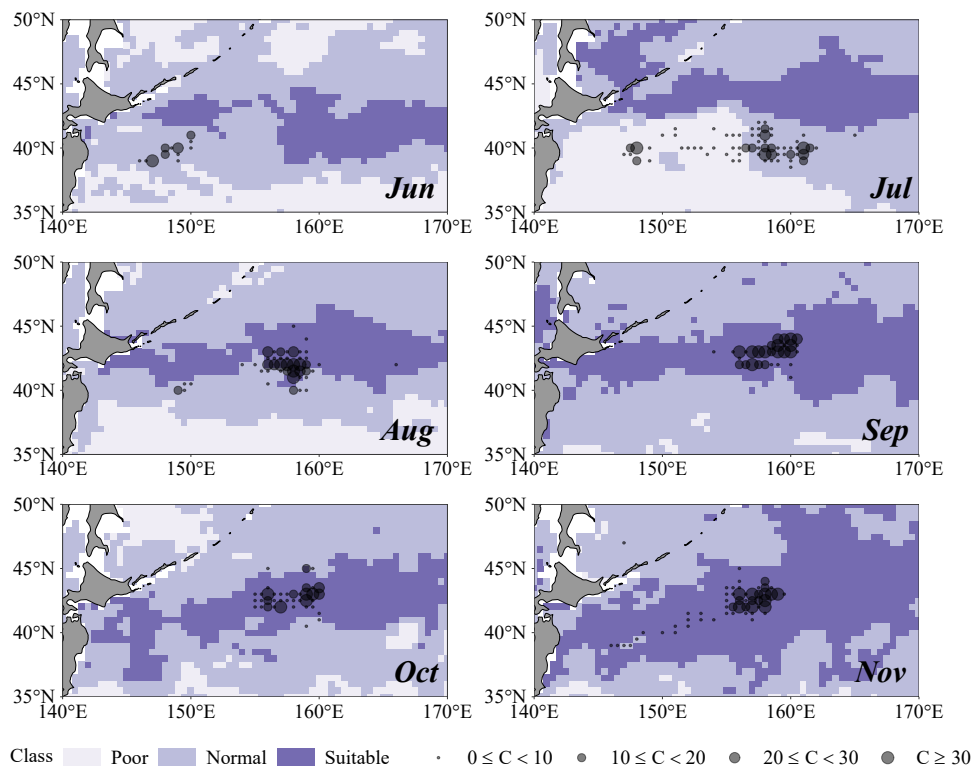

**Figure S4:** Monthly distribution for *O. bartramii* in the Northwest Pacific Ocean in 2018, overlaid on the habitat class map which was predicted by using weighted-AMM based on environmental data from 2018.



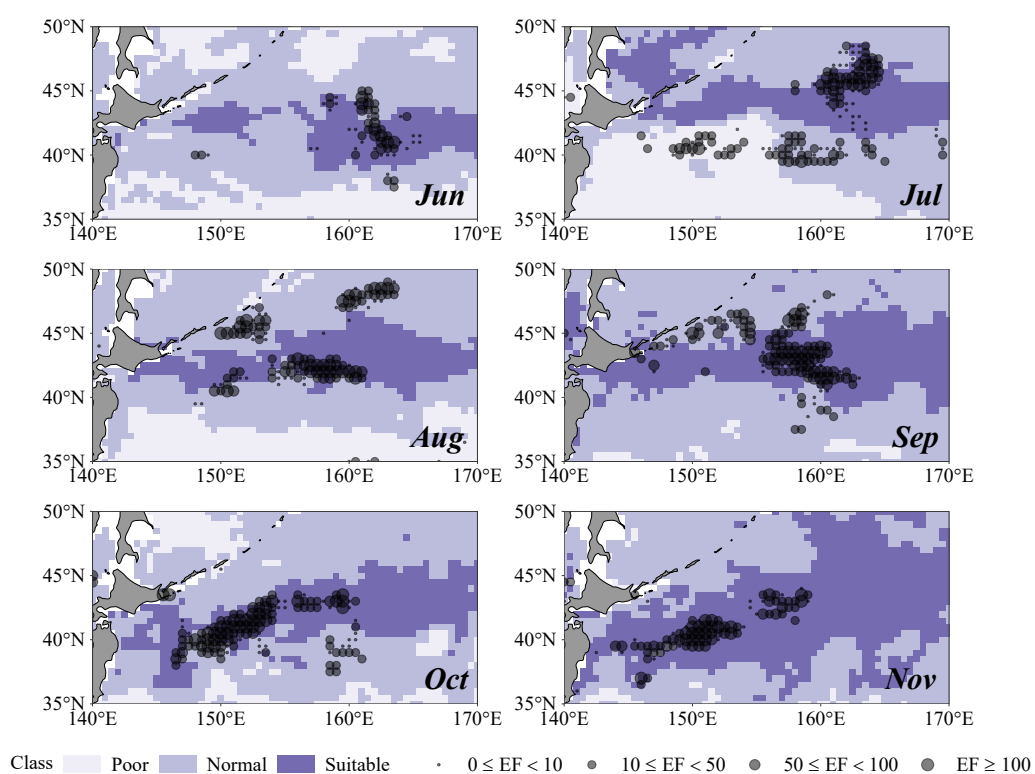

**Figure S5:** Monthly distribution of fishing effort for squid-jigging vessel in the Northwest Pacific Ocean in 2018, overlaid on the habitat class map which was predicted by using weighted-AMM based on environmental data from 2018.

**Table S1:** Optimal parameters for the first and second construction of the BRT model.

| Month | $lr$ in the first | $tc$ in the first | $lr$ in the second | $tc$ in the second |
|-------|-------------------|-------------------|--------------------|--------------------|
| Jun   | 0.005             | 8                 | 0.01               | 8                  |
| Jul   | 0.005             | 7                 | 0.01               | 8                  |
| Aug   | 0.01              | 7                 | 0.005              | 8                  |
| Sep   | 0.01              | 8                 | 0.01               | 6                  |
| Oct   | 0.01              | 8                 | 0.005              | 7                  |
| Nov   | 0.01              | 7                 | 0.01               | 8                  |

**Table S2:** Statistical parameters for each SI model.

| Month | Variable            | Formula                                | RMSE  | MAE    | R <sup>2</sup> |
|-------|---------------------|----------------------------------------|-------|--------|----------------|
| Jun   | Chla <sub>50</sub>  | $y = \exp[-13.10971(x - 0.25817)^2]$   | 0.08  | 0.05   | 0.96           |
|       | DO <sub>0</sub>     | $y = \exp[-0.00291(x - 280.32583)^2]$  | 0.05  | 0.04   | 0.98           |
|       | DO <sub>50</sub>    | $y = \exp[-0.00249(x - 271.95491)^2]$  | 0.09  | 0.05   | 0.94           |
|       | PP <sub>0</sub>     | $y = \exp[-0.06841(x - 20.32789)^2]$   | 0.07  | 0.04   | 0.95           |
|       | PP <sub>50</sub>    | $y = \exp[-1.11789(x - 0.73938)^2]$    | 0.006 | 0.004  | 0.99           |
|       | S <sub>300</sub>    | $y = \exp[-42.62051(x - 33.85641)^2]$  | 0.007 | 0.005  | 0.99           |
| Jul   | Chla <sub>0</sub>   | $y = \exp[-34.29807(x - 0.44688)^2]$   | 0.07  | 0.06   | 0.97           |
|       | DO <sub>0</sub>     | $y = \exp[-0.00115(x - 292.15273)^2]$  | 0.13  | 0.10   | 0.84           |
|       | DO <sub>100</sub>   | $y = \exp[-0.002(x - 257.31089)^2]$    | 0.07  | 0.04   | 0.95           |
|       | DO <sub>150</sub>   | $y = \exp[-0.00153(x - 235.71015)^2]$  | 0.13  | 0.10   | 0.80           |
|       | PP <sub>50</sub>    | $y = \exp[-0.66148(x - 1.94346)^2]$    | 0.04  | 0.03   | 0.98           |
|       | T <sub>0</sub>      | $y = \exp[-0.17326(x - 10.12766)^2]$   | 0.18  | 0.12   | 0.62           |
| Aug   | Chla <sub>50</sub>  | $y = \exp[-66.43419(x - 0.48073)^2]$   | 0.02  | 0.02   | 0.99           |
|       | DO <sub>0</sub>     | $y = \exp[-0.00111(x - 252.91975)^2]$  | 0.13  | 0.10   | 0.84           |
|       | DO <sub>100</sub>   | $y = \exp[-0.00399(x - 232.09859)^2]$  | 0.06  | 0.03   | 0.94           |
|       | PP <sub>0</sub>     | $y = \exp[-0.06048(x - 10.8125)^2]$    | 0.10  | 0.05   | 0.83           |
|       | S <sub>150</sub>    | $y = \exp[-8.18109(x - 33.62496)^2]$   | 0.03  | 0.02   | 0.99           |
|       | T <sub>0</sub>      | $y = \exp[-0.07487(x - 16.74113)^2]$   | 0.18  | 0.11   | 0.73           |
| Sep   | DO <sub>0</sub>     | $y = \exp[-0.003(x - 243.56353)^2]$    | 0.08  | 0.07   | 0.95           |
|       | EKE                 | $y = \exp[-1247.44167(x - 0.02488)^2]$ | 0.001 | 0.0003 | 0.99           |
|       | MLD                 | $y = \exp[-0.01409(x - 12.18304)^2]$   | 0.10  | 0.07   | 0.94           |
|       | Phyc <sub>50</sub>  | $y = \exp[-14.69514(x - 1.22521)^2]$   | 0.007 | 0.006  | 0.99           |
|       | PP <sub>0</sub>     | $y = \exp[-0.01683(x - 10.35844)^2]$   | 0.07  | 0.05   | 0.97           |
|       | T <sub>0</sub>      | $y = \exp[-0.10581(x - 17.01536)^2]$   | 0.09  | 0.06   | 0.94           |
| Oct   | DO <sub>250</sub>   | $y = \exp[-0.00234(x - 177.73152)^2]$  | 0.07  | 0.03   | 0.95           |
|       | EKE                 | $y = \exp[-672.08638(x - 0.02334)^2]$  | 0.008 | 0.003  | 0.99           |
|       | MLD                 | $y = \exp[-0.01274(x - 28.66835)^2]$   | 0.11  | 0.05   | 0.90           |
|       | S <sub>250</sub>    | $y = \exp[-14.18482(x - 33.74047)^2]$  | 0.09  | 0.07   | 0.94           |
|       | S <sub>300</sub>    | $y = \exp[-36.09697(x - 33.84755)^2]$  | 0.01  | 0.009  | 0.99           |
|       | T <sub>0</sub>      | $y = \exp[-0.14085(x - 15.93163)^2]$   | 0.13  | 0.09   | 0.77           |
| Nov   | EKE                 | $y = \exp[-646.18689(x - 0.0227)^2]$   | 0.02  | 0.006  | 0.99           |
|       | MLD                 | $y = \exp[-0.00467(x - 46.57797)^2]$   | 0.08  | 0.05   | 0.94           |
|       | Phyc <sub>0</sub>   | $y = \exp[-8.1503(x - 1.3343)^2]$      | 0.03  | 0.02   | 0.99           |
|       | Phyc <sub>150</sub> | $y = \exp[-484.09479(x - 0.12656)^2]$  | 0.005 | 0.002  | 0.99           |
|       | S <sub>250</sub>    | $y = \exp[-11.10656(x - 33.77468)^2]$  | 0.01  | 0.07   | 0.94           |
|       | S <sub>300</sub>    | $y = \exp[-25.51537(x - 33.8321)^2]$   | 0.02  | 0.02   | 0.99           |

**Table S3:** The favorable range of different variables for fishing effort.

| Month | Variable            | Range                                               |
|-------|---------------------|-----------------------------------------------------|
| Jun   | Chla <sub>50</sub>  | 0.1 ~ 0.5 mg · m <sup>-3</sup>                      |
|       | DO <sub>0</sub>     | 265 ~ 288 mmol · m <sup>-3</sup>                    |
|       | DO <sub>50</sub>    | 255 ~ 290 mmol · m <sup>-3</sup>                    |
|       | PP <sub>0</sub>     | 17 ~ 23 mg · m <sup>-3</sup> · day <sup>-1</sup>    |
|       | PP <sub>50</sub>    | 1.0 ~ 1.5 mg · m <sup>-3</sup> · day <sup>-1</sup>  |
|       | S <sub>300</sub>    | 33.8 ~ 34                                           |
| Jul   | Chla <sub>0</sub>   | 0.3 ~ 0.55 mg · m <sup>-3</sup>                     |
|       | DO <sub>0</sub>     | 270 ~ 300 mmol · m <sup>-3</sup>                    |
|       | DO <sub>100</sub>   | 240 ~ 275 mmol · m <sup>-3</sup>                    |
|       | DO <sub>150</sub>   | 213 ~ 260 mmol · m <sup>-3</sup>                    |
|       | PP <sub>50</sub>    | 1.2 ~ 3 mg · m <sup>-3</sup> · day <sup>-1</sup>    |
|       | T <sub>0</sub>      | 9 ~ 12 °C                                           |
| Aug   | Chla <sub>50</sub>  | 0.4 ~ 0.58 mg · m <sup>-3</sup>                     |
|       | DO <sub>0</sub>     | 230 ~ 270 mmol · m <sup>-3</sup>                    |
|       | DO <sub>100</sub>   | 220 ~ 243 mmol · m <sup>-3</sup>                    |
|       | PP <sub>0</sub>     | 9 ~ 15 mg · m <sup>-3</sup> · day <sup>-1</sup>     |
|       | S <sub>150</sub>    | 33.3 ~ 33.8                                         |
|       | T <sub>0</sub>      | 14 ~ 20 °C                                          |
| Sep   | DO <sub>0</sub>     | 230 ~ 258 mmol · m <sup>-3</sup>                    |
|       | EKE                 | 0 ~ 0.04 m <sup>2</sup> · s <sup>-2</sup>           |
|       | MLD                 | 10 ~ 18 m                                           |
|       | Phyc <sub>50</sub>  | 1 ~ 1.4 mg · m <sup>-3</sup> · day <sup>-1</sup>    |
|       | PP <sub>0</sub>     | 5 ~ 16 mg · m <sup>-3</sup> · day <sup>-1</sup>     |
|       | T <sub>0</sub>      | 15 ~ 19.5 °C                                        |
| Oct   | DO <sub>250</sub>   | 160 ~ 200 mmol · m <sup>-3</sup>                    |
|       | EKE                 | 0 ~ 0.05 m <sup>2</sup> · s <sup>-2</sup>           |
|       | MLD                 | 22 ~ 36 m                                           |
|       | S <sub>250</sub>    | 33.5 ~ 33.9                                         |
|       | S <sub>300</sub>    | 33.7 ~ 34                                           |
|       | T <sub>0</sub>      | 14 ~ 18 °C                                          |
| Nov   | EKE                 | 0 ~ 0.05 m <sup>2</sup> · s <sup>-2</sup>           |
|       | MLD                 | 38 ~ 60 m                                           |
|       | Phyc <sub>0</sub>   | 1.2 ~ 1.6 mg · m <sup>-3</sup> · day <sup>-1</sup>  |
|       | Phyc <sub>150</sub> | 0.1 ~ 0.18 mg · m <sup>-3</sup> · day <sup>-1</sup> |
|       | S <sub>250</sub>    | 33.6 ~ 34                                           |
|       | S <sub>300</sub>    | 33.7 ~ 34                                           |
